# Supplementary material for: Die Dunkle Triade in einer deutschen repräsentativen Stichprobe
Source: Atypon-hosted journal article supplement (doi:10.1026/0012-1924/a000292), 2022-09-05
Supplement: 0012-1924_a000292_esm1.pdf [file 0012-1924_a000292_esm1.pdf]

**Tabelle E1.** Stichprobenbeschreibende Merkmale für die ungewichtete und gewichtete Stichprobe.

| Variable            | Kategorie                                                                                  | Ungewichtet | Gewichtet | Nur Anpassungs-<br>gewicht |
|---------------------|--------------------------------------------------------------------------------------------|-------------|-----------|----------------------------|
| Geschlecht          | Männlich %                                                                                 | 48.0        | 48.6      | 49.2                       |
|                     | Weiblich %                                                                                 | 52.0        | 51.4      | 50.8                       |
| Alter               | Mittelwert                                                                                 | 49.03       | 46.64     | 49.01                      |
|                     | Standardabweichung                                                                         | 19.13       | 17.17     | 18.45                      |
|                     | Jugendliche (14 – 17 Jahre) %                                                              | 8.0         | 3.8       | 6.3                        |
|                     | Junges Erwachsenenalter (18 – 29 Jahre) %                                                  | 13.9        | 18.2      | 4.7                        |
|                     | Mittleres Erwachsenenalter (30 – 49 Jahre) %                                               | 22.8        | 35.7      | 26.6                       |
|                     | Spätes Erwachsenenalter (50 – 65 Jahre) %                                                  | 31.5        | 26.9      | 30.7                       |
|                     | Ältere (66 – 80 Jahre) %                                                                   | 23.8        | 15.4      | 21.8                       |
| Haupterwerbsstatus  | Vollzeiterwerbstätig %                                                                     | 32.4        | 36.5      | 33.2                       |
|                     | Teilzeiterwerbstätig %                                                                     | 12.0        | 6.2       | 8.8                        |
|                     | Altersteilzeit %                                                                           | 0.9         | 0.3       | 0.6                        |
|                     | Geringfügig erwerbstätig %                                                                 | 3.6         | 5.4       | 4.4                        |
|                     | „Ein-Euro-Job“ (bei Bezug von Arbeitslosengeld II) %                                       | 0.2         | 0.8       | 0.5                        |
|                     | Gelegentlich oder unregelmäßig beschäftigt %                                               | 0.3         | 0.1       | 0.2                        |
|                     | In einer beruflichen Ausbildung/Lehre %                                                    | 2.2         | 1.9       | 2.3                        |
|                     | In Umschulung %                                                                            | 0.1         | 1.3       | 0.4                        |
|                     | (Bundes-)Freiwilligendienst/ Freiwilliges Soziales Jahr / Freiwilliges ökologisches Jahr % | 0.1         | 0         | 0.1                        |
|                     | Mutterschafts-, Erziehungsurlaub, Elternzeit oder sonstige Beurlaubung %                   | 1.9         | 4.9       | 2.4                        |
| Berufliche Stellung | Nicht erwerbstätig (einschließlich Schüler:innen oder Studierende) %                       | 46.2        | 42.5      | 47.1                       |
|                     | Arbeiter:in %                                                                              | 10.3        | 28.7      | 15.9                       |
|                     | Angestellte:r %                                                                            | 64.4        | 58.2      | 63.9                       |
|                     | Beamte:r/ Richter:in/ Berufssoldat:in %                                                    | 12.4        | 4.1       | 8.4                        |
|                     | Landwirte %                                                                                | 1.0         | 1.1       | 1.2                        |
|                     | Akademischer freier Beruf (z.B. Arzt mit eigener Praxis) %                                 | 1.4         | 0.4       | 0.9                        |
|                     | Selbstständige:r in Handel %                                                               | 7.1         | 4.2       | 6.1                        |
|                     | Mithelfende:r Familienangehörige:r %                                                       | 0.7         | 0.5       | 0.7                        |
|                     | In Ausbildung %                                                                            | 2.0         | 2.5       | 2.2                        |
|                     | War noch nie erwerbstätig %                                                                | 0.6         | 0.4       | 0.6                        |
| Familienstand       | Verheiratet zusammenlebend %                                                               | 54.9        | 47.1      | 52.0                       |
|                     | In eingetragener Lebenspartnerschaft zusammenlebend (gleichgeschlechtlich) %               | 0.1         | 0.1       | 0.2                        |
|                     | Verheiratet getrenntlebend %                                                               | 2.2         | 2.7       | 2.2                        |
|                     | Ledig %                                                                                    | 29.2        | 33.2      | 30.2                       |
|                     | Geschieden %                                                                               | 8.3         | 11.9      | 9.9                        |
|                     | Verwitwet %                                                                                | 5.3         | 5.0       | 5.5                        |
| Staatsangehörigkeit | Deutsch %                                                                                  | 95.2        | 81.6      | 92.9                       |
|                     | Andere %                                                                                   | 3.0         | 16.2      | 5.6                        |
|                     | Deutsch und Andere %                                                                       | 1.8         | 2.2       | 1.5                        |

| Variable                 | Kategorie                    | Ungewichtet | Gewichtet | Nur Anpassungs-<br>gewicht |
|--------------------------|------------------------------|-------------|-----------|----------------------------|
| Netto-Haushaltseinkommen | Mittelwert                   | 3632.8      | 2875.2    | 3336.4                     |
|                          | Standardabweichung           | 2674.2      | 1636.2    | 2252.8                     |
| Migrationshintergrund    | Kein Migrationshintergrund % | 80.7        | 69.2      | 78.7                       |
|                          | 2./3. Generation %           | 12.5        | 11.7      | 12.3                       |
|                          | 1. Generation                | 6.8         | 19.1      | 8.9                        |

*Anmerkungen:* Für die gewichtete Stichprobe wurden sowohl Anpassungs- als auch Panelgewichte verwendet. Die letzte Spalte („Nur Anpassungsgewicht“) dient lediglich der Information über die Repräsentativität der Stichprobe und wurde nicht für die Datenanalysen verwendet.

**Tabelle E2.** Deskriptive Statistiken und Korrelationen der Items.

| Item | Subskala | MW   | SD   | <i>r</i> |     |     |     |     |     |     |     |  |
|------|----------|------|------|----------|-----|-----|-----|-----|-----|-----|-----|--|
|      |          |      |      | 2        | 3   | 4   | 5   | 6   | 7   | 8   | 9   |  |
| 1    | M        | 2.75 | 1.56 | .20      | .37 | .40 | .19 | .28 | .41 | .25 | .32 |  |
| 2    | P        | 2.85 | 1.76 |          | .12 | .22 | .42 | .10 | .18 | .30 | .12 |  |
| 3    | N        | 3.26 | 1.64 |          |     | .27 | .11 | .62 | .36 | .17 | .50 |  |
| 4    | M        | 2.63 | 1.65 |          |     |     | .33 | .23 | .49 | .31 | .30 |  |
| 5    | P        | 2.16 | 1.52 |          |     |     |     | .13 | .22 | .34 | .18 |  |
| 6    | N        | 3.63 | 1.66 |          |     |     |     |     | .40 | .13 | .49 |  |
| 7    | M        | 2.82 | 1.62 |          |     |     |     |     |     | .28 | .42 |  |
| 8    | P        | 2.11 | 1.49 |          |     |     |     |     |     |     | .28 |  |
| 9    | N        | 2.93 | 1.59 |          |     |     |     |     |     |     |     |  |

*Anmerkungen:* M = Machiavellismus; P = Psychopathie; N= Narzissmus; MW = Mittelwert; SD = Standardabweichung; *r* = Pearson-Korrelation; Itemnummerierung bezieht sich auf die Nummerierung in Kufner et al. (2014).

**Tabelle E3.** Untersuchung der Faktorstrukturen.

| Modell                                         | RMSEA | CFI  | TLI  | SRMR | AIC        | BIC        | MLR- $\chi^2$ | df |
|------------------------------------------------|-------|------|------|------|------------|------------|---------------|----|
| <b>Stichprobe 1 gewichtet</b>                  |       |      |      |      |            |            |               |    |
| Einfaktorielles Modell                         | .153  | .741 | .655 | .097 | 22 415.472 | 22 537.568 | 86.052        | 27 |
| Zweifaktorielles Modell                        | .104  | .886 | .843 | .082 | 22 154.606 | 22 281.225 | 53.844        | 26 |
| Dreifaktorielles Modell                        | .063  | .962 | .943 | .062 | 21 999.761 | 22 135.424 | 34.638        | 24 |
| Bifaktor-(S – 1) Modell (Ref. M) <sup>1</sup>  | .060  | .969 | .947 | .051 | 21 987.319 | 22 136.548 | 28.912        | 21 |
| Bifaktor-(S – 1) Modell (Ref. P) <sup>1</sup>  | .101  | .912 | .849 | .084 | 22 083.579 | 22 232.808 | 43.205        | 21 |
| Bifaktor-(S – 1) Modell (Ref. N) <sup>1</sup>  | .113  | .891 | .813 | .096 | 22 108.619 | 22 257.848 | 50.732        | 21 |
| Zwei-Bifaktor Modell (Ref. M) <sup>2*</sup>    | .054  | .978 | .958 | .049 | 21 969.800 | 22 128.073 | 24.431        | 19 |
| <b>Stichprobe 2 ungewichtet</b>                |       |      |      |      |            |            |               |    |
| Einfaktorielles Modell                         | .141  | .755 | .673 | .091 | 22 186.103 | 22 267.527 | 321.347       | 27 |
| Zweifaktorielles Modell                        | .101  | .879 | .832 | .070 | 22 001.210 | 22 087.158 | 173.198       | 26 |
| Dreifaktorielles Modell                        | .072  | .943 | .914 | .049 | 21 906.229 | 22 001.224 | 93.390        | 24 |
| Bifaktor-(S – 1) Modell (Ref. M) <sup>1</sup>  | .058  | .967 | .944 | .034 | 21 871.437 | 21 980.002 | 61.632        | 21 |
| Bifaktor-(S – 1) Modell (Ref. P) <sup>1</sup>  | .102  | .901 | .830 | .067 | 21 969.664 | 22 078.230 | 149.781       | 21 |
| Bifaktor-(S – 1) Modell (Ref. N) <sup>1</sup>  | .096  | .913 | .850 | .069 | 21 953.565 | 22 062.130 | 128.818       | 21 |
| Zwei-Bifaktor Modell (Ref. M) <sup>2</sup>     | .053  | .976 | .954 | .027 | 21 860.506 | 21 978.119 | 49.566        | 19 |
| Zwei-Bifaktor Modell (Ref. P) <sup>2*</sup>    | .097  | .918 | .845 | .060 | 21 946.185 | 22 063.798 | 124.075       | 19 |
| Zwei-Bifaktor Modell (Ref. N) <sup>2*</sup>    | .099  | .916 | .840 | .047 | 21 950.532 | 22 068.145 | 124.693       | 19 |
| Bifaktor-(S·I – 1) (Ref. M) <sup>2*</sup>      | .062  | .966 | .936 | .034 | 21 875.435 | 21 993.047 | 58.887        | 19 |
| Bifaktor-(S·I – 1) (Ref. P) <sup>2</sup>       | .101  | .912 | .834 | .060 | 21 956.980 | 22 074.593 | 122.775       | 19 |
| Bifaktor-(S·I – 1) (Ref. N) <sup>2*</sup>      | .099  | .916 | .840 | .070 | 21 952.054 | 22 069.667 | 117.981       | 19 |
| <b>Stichprobe 2 gewichtet</b>                  |       |      |      |      |            |            |               |    |
| Einfaktorielles Modell                         | .077  | .902 | .870 | .062 | 22 423.688 | 22 545.824 | 42.244        | 27 |
| Zweifaktorielles Modell                        | .075  | .911 | .877 | .061 | 22 412.936 | 22 539.595 | 39.580        | 26 |
| Dreifaktorielles Modell                        | .062  | .942 | .914 | .052 | 22 371.186 | 22 506.892 | 32.642        | 24 |
| Hierarchisches Modell                          | .062  | .942 | .914 | .052 | 22 371.186 | 22 506.892 | 32.642        | 24 |
| Bifaktor-(S – 1) Modell (Ref. M) <sup>1*</sup> | .061  | .952 | .918 | .046 | 22 348.923 | 22 498.201 | 27.940        | 21 |
| Bifaktor-(S – 1) Modell (Ref. N) <sup>1</sup>  | .063  | .949 | .913 | .048 | 22 356.129 | 22 505.407 | 28.270        | 21 |
| Zwei-Bifaktor Modell (Ref. P) <sup>2*</sup>    | .085  | .916 | .841 | .055 | 22 383.705 | 22 542.030 | 30.716        | 19 |

*Anmerkungen:* <sup>1</sup>Als Referenzfaktor wurde Machiavellismus (M), bzw. Psychopathie (P) oder Narzissmus (N) gewählt; <sup>2</sup>Als Referenz wurde ein Indikator für Machiavellismus (M), bzw. Psychopathie (P) oder Narzissmus (N) gewählt; \*Für dieses Modell wurden Anomalien beobachtet (z. B. negative Ladungen oder Varianzen); Modelle, die Konvergenz- und größere Schätzprobleme erzeugt haben, werden in der Tabelle nicht dargestellt; RMSEA = Root Mean Square Error of Approximation; CFI = Comparative Fit Index; TLI = Tucker-Lewis Index; SRMR = Standardized Root Mean Square Residual; AIC = Akaike Information Criterion; BIC = Bayesian Information Criterion; MLR = Robuste Maximum-Likelihood-Schätzung.

**Tabelle E4.** Messinvarianzanalysen über das Geschlecht.

| Modell                                                        | RMSEA | $\Delta$ RMSEA | CFI  | $\Delta$ CFI | NCI  | $\Delta$ NCI | Gamma-hat | $\Delta$ Gamma-hat | $\chi^2$ | df | p     |
|---------------------------------------------------------------|-------|----------------|------|--------------|------|--------------|-----------|--------------------|----------|----|-------|
| <b>Dreifaktorielles Modell</b>                                |       |                |      |              |      |              |           |                    |          |    |       |
| <b>Stichprobe 1 ungewichtet</b>                               |       |                |      |              |      |              |           |                    |          |    |       |
| Konfigural                                                    | .072  | -              | .945 | -            | .933 | -            | .977      | -                  | -        | -  | -     |
| Metrisch                                                      | .070  | -.002          | .942 | -.003        | .929 | -.004        | .976      | -.001              | 9.129    | 6  | .166  |
| Skalar                                                        | .069  | -.001          | .938 | -.004        | .924 | -.005        | .974      | <b>-.002</b>       | 13.555   | 6  | .035  |
| Strikt                                                        | .063  | -.006          | .940 | .002         | .924 | .000         | .975      | .001               | 6.730    | 9  | .665  |
| Mittelwerte                                                   | .071  | .008           | .921 | <b>-.019</b> | .904 | -.020        | .968      | <b>-.007</b>       | 29.917   | 3  | <.001 |
| <b>Stichprobe 1 gewichtet</b>                                 |       |                |      |              |      |              |           |                    |          |    |       |
| Konfigural                                                    | .075  | -              | .944 | -            | .797 | -            | .995      | -                  | -        | -  | -     |
| Metrisch                                                      | .063  | -.012          | .956 | .012         | .793 | -.004        | .996      | .001               | 2.409    | 6  | .878  |
| Skalar                                                        | .061  | -.002          | .954 | -.002        | .779 | -.014        | .995      | -.001              | 6.704    | 6  | .349  |
| Strikt                                                        | .045  | -.016          | .971 | .017         | .763 | -.016        | .997      | .002               | 5.141    | 9  | .822  |
| Mittelwerte                                                   | .043  | -.002          | .973 | .002         | .759 | -.004        | .997      | .000               | 2.349    | 3  | .503  |
| <b>Stichprobe 2 ungewichtet</b>                               |       |                |      |              |      |              |           |                    |          |    |       |
| Konfigural                                                    | .066  | -              | .947 | -            | .941 | -            | .981      | -                  | -        | -  | -     |
| Metrisch                                                      | .070  | .004           | .934 | <b>-.013</b> | .928 | -.013        | .976      | <b>-.005</b>       | 24.378   | 6  | <.001 |
| Metrisch ( $\lambda$ 8 frei) <sup>1</sup>                     | .063  | -.003          | .947 | .000         | .941 | .000         | .981      | .000               | 4.955    | 5  | .421  |
| Skalar ( $\lambda$ 8 frei) <sup>2</sup>                       | .061  | -.002          | .945 | -.002        | .938 | -.003        | .980      | -.001              | 9.377    | 6  | .153  |
| Strikt ( $\lambda$ 8 frei)                                    | .057  | -.004          | .944 | -.001        | .935 | -.003        | .980      | .000               | 9.449    | 9  | .397  |
| Mittelwerte ( $\lambda$ 8 frei)                               | .080  | <b>.023</b>    | .886 | <b>-.058</b> | .883 | <b>-.052</b> | .961      | <b>-.019</b>       | 75.914   | 3  | <.001 |
| <b>Stichprobe 2 gewichtet</b>                                 |       |                |      |              |      |              |           |                    |          |    |       |
| Konfigural                                                    | .070  | -              | .925 | -            | .790 | -            | .996      | -                  | -        | -  | -     |
| Metrisch                                                      | .078  | .008           | .896 | <b>-.029</b> | .757 | <b>-.033</b> | .994      | <b>-.002</b>       | 11.519   | 6  | .074  |
| Metrisch ( $\lambda$ 9 frei) <sup>1</sup>                     | .066  | -.004          | .927 | .002         | .780 | -.010        | .996      | .000               | 4.576    | 5  | .470  |
| Skalar ( $\lambda$ 9 frei) <sup>2</sup>                       | .070  | .004           | .908 | <b>-.019</b> | .756 | <b>-.024</b> | .994      | .000               | 10.250   | 6  | .115  |
| Skalar ( $\lambda$ 9 & $\alpha$ 3 frei) <sup>2</sup>          | .067  | .001           | .919 | -.008        | .765 | -.015        | .995      | -.001              | 6.841    | 5  | .233  |
| Strikt ( $\lambda$ 9 & $\alpha$ 3 frei) <sup>3</sup>          | .055  | -.012          | .935 | .016         | .714 | <b>-.051</b> | .997      | .002               | 7.697    | 9  | .565  |
| Mittelwerte ( $\lambda$ 9 & $\alpha$ 3 frei)                  | .079  | <b>.024</b>    | .863 | <b>-.072</b> | .671 | <b>-.043</b> | .993      | <b>-.004</b>       | 27.598   | 3  | <.001 |
| <b>Bifaktor-(S-1) Modell (Referenzfaktor Machiavellismus)</b> |       |                |      |              |      |              |           |                    |          |    |       |
| <b>Stichprobe 1 ungewichtet</b>                               |       |                |      |              |      |              |           |                    |          |    |       |
| Konfigural                                                    | .067  | -              | .959 | -            | .950 | -            | .982      | -                  | -        | -  | -     |

| Modell                                                          | RMSEA | $\Delta$ RMSEA | CFI  | $\Delta$ CFI | NCI  | $\Delta$ NCI | Gamma-hat | $\Delta$ Gamma-hat | $\chi^2$ | df | p     |
|-----------------------------------------------------------------|-------|----------------|------|--------------|------|--------------|-----------|--------------------|----------|----|-------|
| Metrisch                                                        | .067  | .000           | .947 | <b>-.012</b> | .935 | -.015        | .978      | <b>-.004</b>       | 27.208   | 12 | .007  |
| Metrisch (DK $\lambda$ 5 frei) <sup>1</sup>                     | .065  | -.002          | .951 | -.008        | .939 | -.011        | .980      | <b>-.002</b>       | 20.662   | 11 | .037  |
| Skalar (DK $\lambda$ 5 frei) <sup>2</sup>                       | .063  | -.002          | .949 | -.002        | .937 | -.002        | .978      | <b>-.002</b>       | 9.417    | 6  | .151  |
| Strikt (DK $\lambda$ 5 frei)                                    | .056  | -.007          | .953 | .004         | .938 | .001         | .980      | .002               | 4.847    | 9  | .847  |
| Mittelwerte (DK $\lambda$ 5 frei)                               | .065  | .009           | .934 | <b>-.019</b> | .918 | -.020        | .973      | <b>-.007</b>       | 33.012   | 3  | <.001 |
| <b>Stichprobe 1 gewichtet</b>                                   |       |                |      |              |      |              |           |                    |          |    |       |
| Konfigural                                                      | .068  | -              | .960 | -            | .820 | -            | .996      | -                  | -        | -  | -     |
| Metrisch                                                        | .046  | -.022          | .976 | .016         | .803 | -.017        | .998      | .002               | 7.357    | 12 | .833  |
| Skalar                                                          | .043  | -.003          | .976 | .000         | .791 | -.012        | .998      | .000               | 5.778    | 6  | .449  |
| Strikt                                                          | .018  | -.025          | .996 | .020         | .775 | -.016        | 1.00      | .002               | 4.833    | 9  | .849  |
| Mittelwerte                                                     | .019  | .001           | .994 | -.002        | .769 | -.006        | .999      | -.001              | 3.469    | 3  | .325  |
| <b>Stichprobe 2 ungewichtet</b>                                 |       |                |      |              |      |              |           |                    |          |    |       |
| Konfigural                                                      | .058  | -              | .964 | -            | .959 | -            | .987      | -                  | -        | -  | -     |
| Metrisch                                                        | .062  | .004           | .948 | <b>-.016</b> | .942 | -.017        | .981      | <b>-.006</b>       | 31.336   | 12 | .002  |
| Metrisch (DK $\lambda$ 8 frei) <sup>1</sup>                     | .058  | .000           | .956 | -.008        | .950 | -.009        | .984      | <b>-.003</b>       | 20.949   | 11 | .034  |
| Skalar (DK $\lambda$ 8 frei) <sup>2</sup>                       | .054  | -.004          | .957 | .001         | .951 | .001         | .984      | .000               | 4.202    | 6  | .649  |
| Strikt (DK $\lambda$ 8 frei)                                    | .047  | -.007          | .962 | .005         | .952 | .001         | .987      | .003               | 4.506    | 9  | .875  |
| Mittelwerte (DK $\lambda$ 8 frei)                               | .074  | <b>.027</b>    | .903 | <b>-.059</b> | .898 | <b>-.054</b> | .966      | <b>-.021</b>       | 80.658   | 3  | <.001 |
| <b>Zwei-Bifaktor Modell (Referenzindikator Machiavellismus)</b> |       |                |      |              |      |              |           |                    |          |    |       |
| <b>Stichprobe 1 ungewichtet</b>                                 |       |                |      |              |      |              |           |                    |          |    |       |
| Konfigural                                                      | .061  | -              | .969 | -            | .963 | -            | .986      | -                  | -        | -  | -     |
| Metrisch                                                        | .061  | .000           | .958 | <b>-.011</b> | .947 | -.016        | .982      | <b>-.004</b>       | 25.594   | 14 | .029  |
| Metrisch (DK $\lambda$ 5 frei) <sup>1</sup>                     | .057  | -.004          | .964 | -.005        | .953 | -.010        | .985      | -.001              | 18.336   | 13 | .145  |
| Skalar (DK $\lambda$ 5 frei) <sup>2</sup>                       | .056  | -.001          | .961 | -.003        | .949 | -.004        | .983      | <b>-.002</b>       | 10.715   | 6  | .098  |
| Strikt (DK $\lambda$ 5 frei)                                    | .050  | -.006          | .964 | .003         | .950 | .001         | .985      | .002               | 5.145    | 9  | .821  |
| Mittelwerte (DK $\lambda$ 5 frei)                               | .060  | .010           | .945 | <b>-.019</b> | .930 | -.020        | .977      | <b>-.008</b>       | 32.216   | 3  | <.001 |
| <b>Stichprobe 2 ungewichtet</b>                                 |       |                |      |              |      |              |           |                    |          |    |       |
| Konfigural                                                      | .057  | -              | .969 | -            | .966 | -            | .988      | -                  | -        | -  | -     |
| Metrisch                                                        | .058  | .001           | .956 | <b>-.013</b> | .951 | -.015        | .984      | <b>-.004</b>       | 28.297   | 14 | .013  |
| Metrisch (DK $\lambda$ 8 frei) <sup>1</sup>                     | .054  | -.003          | .963 | -.006        | .957 | -.009        | .986      | <b>-.002</b>       | 19.561   | 13 | .107  |

| Modell                                                      | RMSEA | $\Delta$ RMSEA | CFI  | $\Delta$ CFI | NCI  | $\Delta$ NCI | Gamma-hat | $\Delta$ Gamma-hat | $\chi^2$ | df | p     |
|-------------------------------------------------------------|-------|----------------|------|--------------|------|--------------|-----------|--------------------|----------|----|-------|
| Skalar (DK $\lambda$ 8 frei) <sup>2</sup>                   | .051  | -.003          | .963 | .000         | .957 | .000         | .986      | .000               | 5.823    | 6  | .443  |
| Strikt (DK $\lambda$ 8 frei)                                | .043  | -.008          | .969 | .006         | .960 | .003         | .989      | .003               | 3.566    | 9  | .938  |
| Mittelwerte (DK $\lambda$ 8 frei)                           | .072  | <b>.029</b>    | .911 | <b>-.058</b> | .905 | <b>-.055</b> | .968      | <b>-.021</b>       | 89.302   | 3  | <.001 |
| <b>Bifaktor-(S*I-1) (Referenzindikator Machiavellismus)</b> |       |                |      |              |      |              |           |                    |          |    |       |
| <b>Stichprobe 1 ungewichtet</b>                             |       |                |      |              |      |              |           |                    |          |    |       |
| Konfigural                                                  | .071  | -              | .958 | -            | .948 | -            | .983      | -                  | -        | -  | -     |
| Metrisch                                                    | .070  | -.001          | .945 | <b>-.013</b> | .933 | -.015        | .977      | <b>-.006</b>       | 30.354   | 13 | .004  |
| Metrisch (DK $\lambda$ 5 frei) <sup>1</sup>                 | .068  | -.003          | .950 | -.008        | .938 | -.010        | .979      | <b>-.004</b>       | 23.293   | 12 | .025  |
| Skalar (DK $\lambda$ 5 frei) <sup>2</sup>                   | .066  | -.002          | .947 | -.003        | .935 | -.003        | .977      | <b>-.002</b>       | 9.833    | 5  | .080  |
| Strikt (DK $\lambda$ 5 frei)                                | .059  | -.007          | .951 | .004         | .937 | .002         | .980      | .003               | 4.846    | 9  | .848  |
| Mittelwerte (DK $\lambda$ 5 frei)                           | .068  | .009           | .932 | <b>-.019</b> | .917 | -.020        | .972      | <b>-.008</b>       | 31.795   | 4  | <.001 |

*Anmerkungen:* Die Ergebnisse werden hier nur für Kombinationen aus Stichproben und Modellen dargestellt, die keine Schätzprobleme oder Anomalien erzeugt haben; <sup>1</sup>Vergleich mit dem konfiguralen Modell; <sup>2</sup>Vergleich mit dem partiell metrischen Modell; <sup>3</sup>Vergleich mit dem partiell skalaren Modell; RMSEA = Root Mean Square Error of Approximation; CFI = Comparative Fit Index; NCI = McDonald's Noncentrality Index;  $\chi^2$  & df = Prüfgröße und Freiheitsgrade der  $\chi^2$ -Differenzentests; Fett markierte Werte verdeutlichen Nicht-Invarianz; Nummerierung der einzelnen Itemparameter bezieht sich auf die Itemnummerierung in Kufner et al. (2014).

**Tabelle E5.** Messinvarianzanalysen über das Alter mit Multigruppenanalysen.

| Modell                                                                                                | RMSEA | $\Delta$ RMSEA | CFI   | $\Delta$ CFI | NCI   | $\Delta$ NCI | Gamma-hat | $\Delta$ Gamma-hat | $\chi^2$ | df | p     |
|-------------------------------------------------------------------------------------------------------|-------|----------------|-------|--------------|-------|--------------|-----------|--------------------|----------|----|-------|
| <b>Dreifaktorielles Modell</b>                                                                        |       |                |       |              |       |              |           |                    |          |    |       |
| <b>ungewichtet</b>                                                                                    |       |                |       |              |       |              |           |                    |          |    |       |
| Konfigural                                                                                            | .074  | -              | .942  | -            | .929  |              | .976      |                    | -        | -  | -     |
| Metrisch                                                                                              | .066  | -.008          | .945  | .003         | .932  | .003         | .977      | .001               | 14.421   | 24 | .937  |
| Skalar                                                                                                | .068  | .002           | .930  | <b>-.015</b> | .916  | -.016        | .970      | <b>-.007</b>       | 69.442   | 24 | <.001 |
| Skalar ( $\alpha_6$ & $\alpha_7$ frei) <sup>1</sup>                                                   | .065  | -.001          | .939  | -.006        | .925  | -.007        | .974      | <b>-.003</b>       | 33.804   | 16 | .006  |
| Strikt ( $\alpha_6$ & $\alpha_7$ frei) <sup>2</sup>                                                   | .067  | .002           | .922  | <b>-.017</b> | .904  | <b>-.021</b> | .968      | <b>-.006</b>       | 75.468   | 36 | <.001 |
| Strikt ( $\alpha_6$ , $\alpha_7$ , $\epsilon_5$ , $\epsilon_6$ & $\epsilon_8$ frei) <sup>2</sup>      | .063  | -.002          | .934  | -.005        | .919  | -.006        | .972      | <b>-.002</b>       | 37.156   | 24 | .042  |
| Mittelwerte ( $\alpha_6$ , $\alpha_7$ , $\epsilon_5$ , $\epsilon_6$ & $\epsilon_8$ frei) <sup>3</sup> | .074  | .011           | .906  | <b>-.028</b> | .890  | <b>-.029</b> | .960      | <b>-.012</b>       | 100.752  | 12 | <.001 |
| <b>gewichtet</b>                                                                                      |       |                |       |              |       |              |           |                    |          |    |       |
| Konfigural                                                                                            | .096  | -              | 0.891 | -            | 0.767 | -            | 0.989     | -                  | -        | -  | -     |
| <b>Bifaktor-(S-1)-Modell (Referenzfaktor Machiavellismus)</b>                                         |       |                |       |              |       |              |           |                    |          |    |       |
| <b>ungewichtet</b>                                                                                    |       |                |       |              |       |              |           |                    |          |    |       |
| Konfigural                                                                                            | .070  | -              | .955  | -            | .945  | -            | .980      | -                  | -        | -  | -     |
| Metrisch                                                                                              | .053  | -.017          | .962  | .007         | .949  | .004         | .984      | .004               | 30.800   | 48 | .975  |
| Skalar                                                                                                | .057  | .004           | .949  | <b>-.013</b> | .935  | -.014        | .978      | <b>-.006</b>       | 62.116   | 24 | <.001 |
| Skalar ( $\alpha_1$ & $\alpha_6$ frei) <sup>1</sup>                                                   | .052  | -.001          | .960  | -.002        | .947  | -.002        | .983      | -.001              | 21.246   | 16 | .169  |
| Strikt ( $\alpha_1$ & $\alpha_6$ frei) <sup>2</sup>                                                   | .056  | .004           | .944  | <b>-.016</b> | .926  | <b>-.021</b> | .977      | <b>-.006</b>       | 74.469   | 36 | <.001 |
| Strikt ( $\alpha_1$ , $\alpha_6$ , $\epsilon_5$ & $\epsilon_8$ frei) <sup>2</sup>                     | .053  | .001           | .950  | -.010        | .935  | -.012        | .979      | <b>-.004</b>       | 52.430   | 28 | .003  |
| Mittelwerte ( $\alpha_1$ , $\alpha_6$ , $\epsilon_5$ & $\epsilon_8$ frei) <sup>3</sup>                | .067  | .014           | .916  | <b>-.034</b> | .900  | <b>-.035</b> | .965      | <b>-.014</b>       | 115.915  | 12 | <.001 |

*Anmerkungen:* Die Ergebnisse werden hier nur für Kombinationen aus Stichproben und Modellen dargestellt, die keine Schätzprobleme oder Anomalien erzeugt haben; <sup>1</sup>Vergleich mit dem metrischen Modell; <sup>2</sup>Vergleich mit dem partiell skalaren Modell; <sup>3</sup>Vergleich mit dem partiell strikten Modell; Aufgrund von Schätzproblemen wird das Bifaktor-(S-1)-Modell in der gewichteten Stichprobe nicht dargestellt; RMSEA = Root Mean Square Error of Approximation; CFI = Comparative Fit Index; NCI = McDonald's Noncentrality Index;  $\chi^2$  & df = Prüfgröße und Freiheitsgrade der  $\chi^2$ -Differenzentests; Fett markierte Werte verdeutlichen Nicht-Invarianz; Nummerierung der einzelnen Itemparameter bezieht sich auf die Itemnummerierung in Kufner et al. (2014).



**Tabelle E6.** Messinvarianzanalysen über das Alter mit lokal gewichteten Strukturgleichungsmodellen.

| Modell                                                        | RMSEA | $\Delta$ RMSEA | CFI  | $\Delta$ CFI | NCI  | $\Delta$ NCI |
|---------------------------------------------------------------|-------|----------------|------|--------------|------|--------------|
| <b>Dreifaktorielles Modell</b>                                |       |                |      |              |      |              |
| <b>ungewichtet</b>                                            |       |                |      |              |      |              |
| Konfigural                                                    | .071  | -              | .946 | -            | .941 | -            |
| Metrisch                                                      | .058  | -.014          | .952 | .006         | .947 | .006         |
| Skalar                                                        | .063  | .005           | .927 | <b>-.024</b> | .921 | <b>-.026</b> |
| Skalar ( $\alpha_6$ & $\alpha_7$ frei) <sup>1</sup>           | .062  | .004           | .933 | <b>-.019</b> | .927 | <b>-.020</b> |
| <b>gewichtet</b>                                              |       |                |      |              |      |              |
| Konfigural                                                    | .071  | -              | .946 | -            | .941 | -            |
| Metrisch                                                      | .057  | -.014          | .952 | .006         | .948 | .006         |
| Skalar                                                        | .063  | .006           | .926 | <b>-.027</b> | .920 | <b>-.028</b> |
| Skalar ( $\alpha_6$ & $\alpha_7$ frei) <sup>1</sup>           | .062  | .005           | .932 | <b>-.021</b> | .926 | <b>-.022</b> |
| <b>Bifaktor-(S-1)-Modell (Referenzfaktor Machiavellismus)</b> |       |                |      |              |      |              |
| <b>ungewichtet</b>                                            |       |                |      |              |      |              |
| Konfigural                                                    | .063  | -              | .963 | -            | .959 | -            |
| Metrisch                                                      | .042  | -.021          | .972 | .009         | .969 | .009         |
| Skalar                                                        | .051  | .008           | .950 | <b>-.022</b> | .945 | <b>-.024</b> |
| Skalar ( $\alpha_1$ & $\alpha_6$ frei) <sup>1</sup>           | .050  | .008           | .952 | <b>-.020</b> | .947 | <b>-.022</b> |
| <b>gewichtet</b>                                              |       |                |      |              |      |              |
| Konfigural                                                    | .127  | -              | .853 | -            | .844 | -            |

*Anmerkungen:* <sup>1</sup>Vergleich mit dem metrischen Modell; RMSEA = Root Mean Square Error of Approximation; CFI = Comparative Fit Index; NCI = McDonald's Noncentrality Index; Fett markierte Werte verdeutlichen Nicht-Invarianz; Nummerierung der einzelnen Itemparameter bezieht sich auf die Itemnummerierung in Kufner et al. (2014).
