# Supplementary material for: Die Dunkle Triade in einer deutschen repräsentativen Stichprobe
Source: Atypon-hosted journal article supplement (doi:10.1026/0012-1924/a000292), 2022-09-05
Supplement: 0012-1924_a000292_esm3.pdf [file 0012-1924_a000292_esm3.pdf]

**Einfaktorielles Modell**

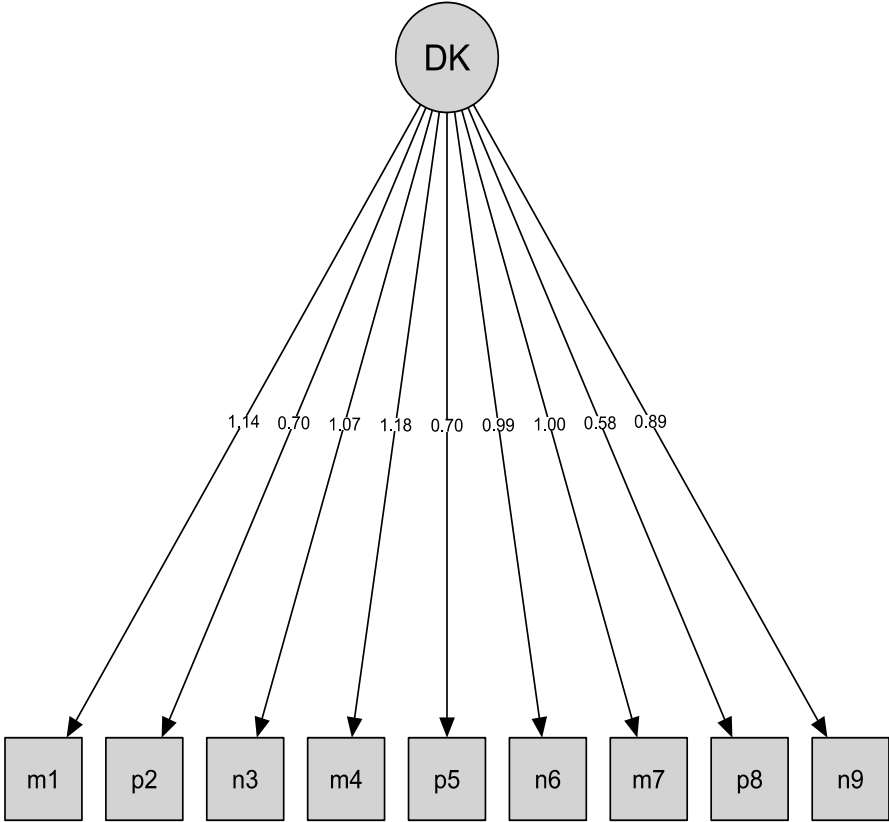

*Anmerkungen:* Es werden unstandardisierte Werte dargestellt; DK = Dunkler Kern; m = Indikator für Machiavellismus; p = Indikator für Psychopathie; n = Indikator für Narzissmus; Itemnummerierung bezieht sich auf die Nummerierung in Kufner et al. (2014).

## Zweifaktorielles Modell

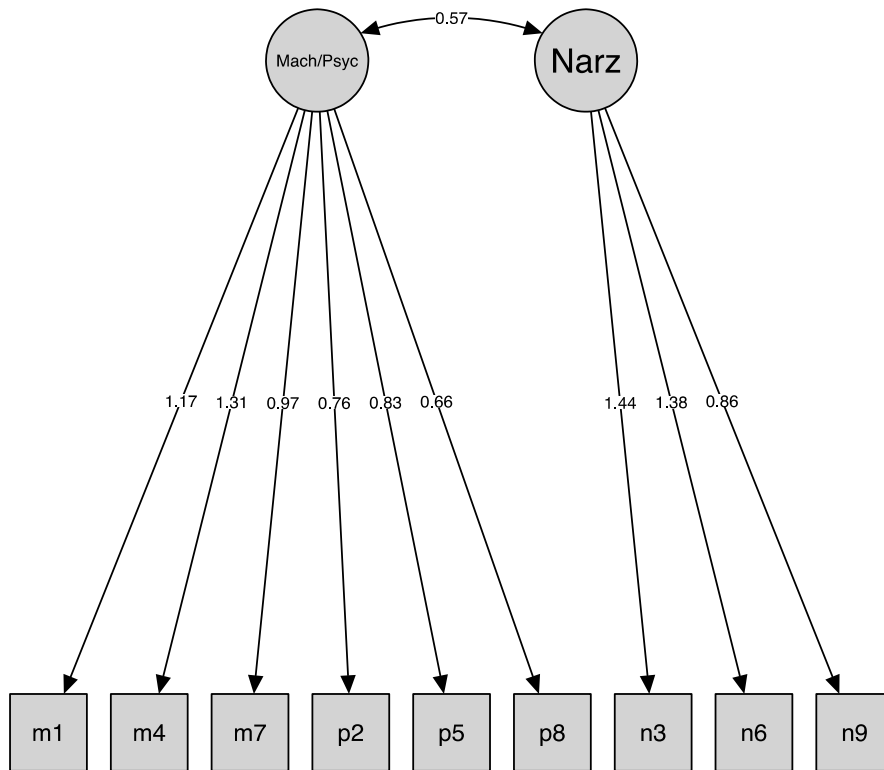

*Anmerkungen:* Es werden unstandardisierte Werte dargestellt; Mach = Machiavellismus; Psyc = Psychopathie; Narz = Narzissmus; m = Indikator für Machiavellismus; p = Indikator für Psychopathie; n = Indikator für Narzissmus; Itemnummerierung bezieht sich auf die Nummerierung in Kufner et al. (2014).

**Dreifaktorielles Modell**

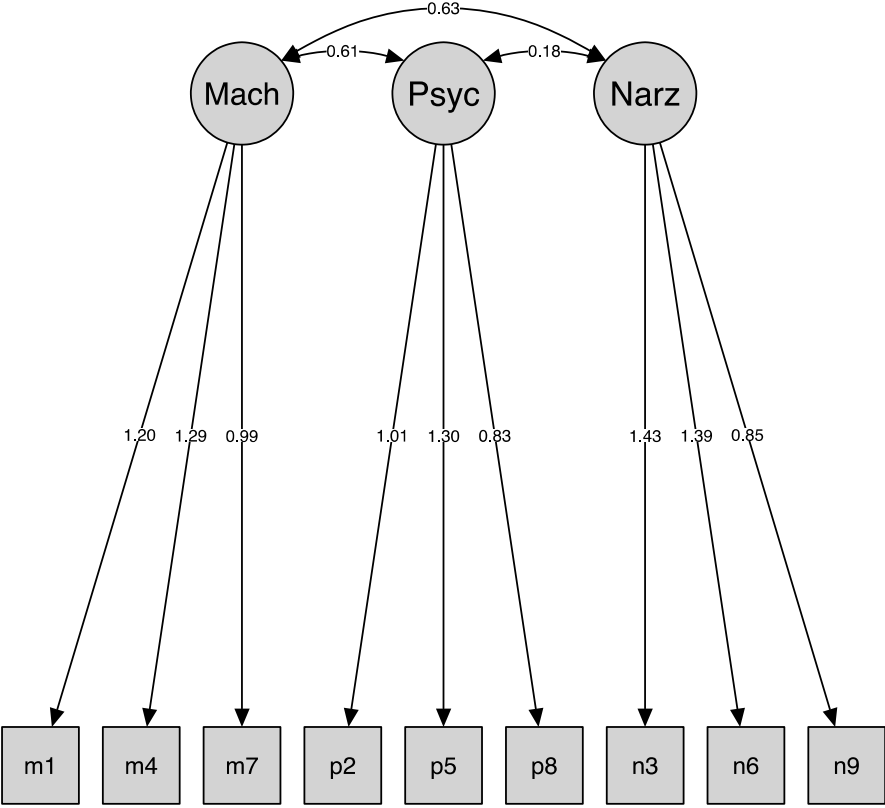

*Anmerkungen:* Es werden unstandardisierte Werte dargestellt; Mach = Machiavellismus; Psyc = Psychopathie; Narz = Narzissmus; m = Indikator für Machiavellismus; p = Indikator für Psychopathie; n = Indikator für Narzissmus; Itemnummerierung bezieht sich auf die Nummerierung in Kűfner et al. (2014).

**Bifaktor-(S – 1)-Modell mit Machiavellismus als Referenzkonstrukt**

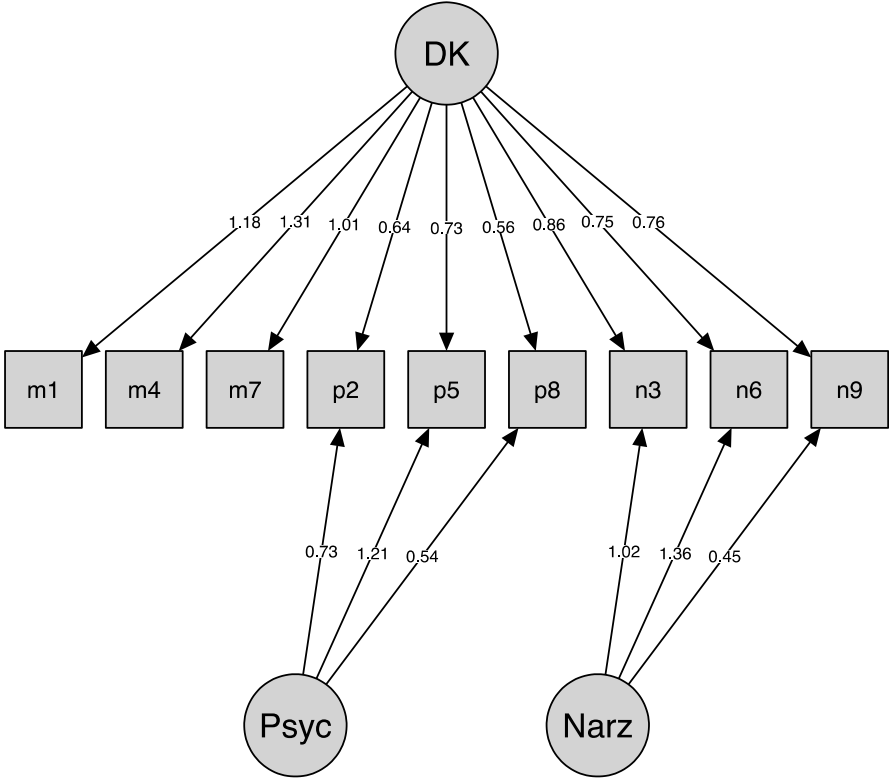

*Anmerkungen:* Es werden unstandardisierte Werte dargestellt; DK = Dunkler Kern; Psyc = Psychopathie; Narz = Narzissmus; m = Indikator für Machiavellismus; p = Indikator für Psychopathie; n = Indikator für Narzissmus; Itemnummerierung bezieht sich auf die Nummerierung in Küfner et al. (2014).

**Bifaktor-(S – 1)-Modell mit Psychopathie als Referenzkonstrukt**

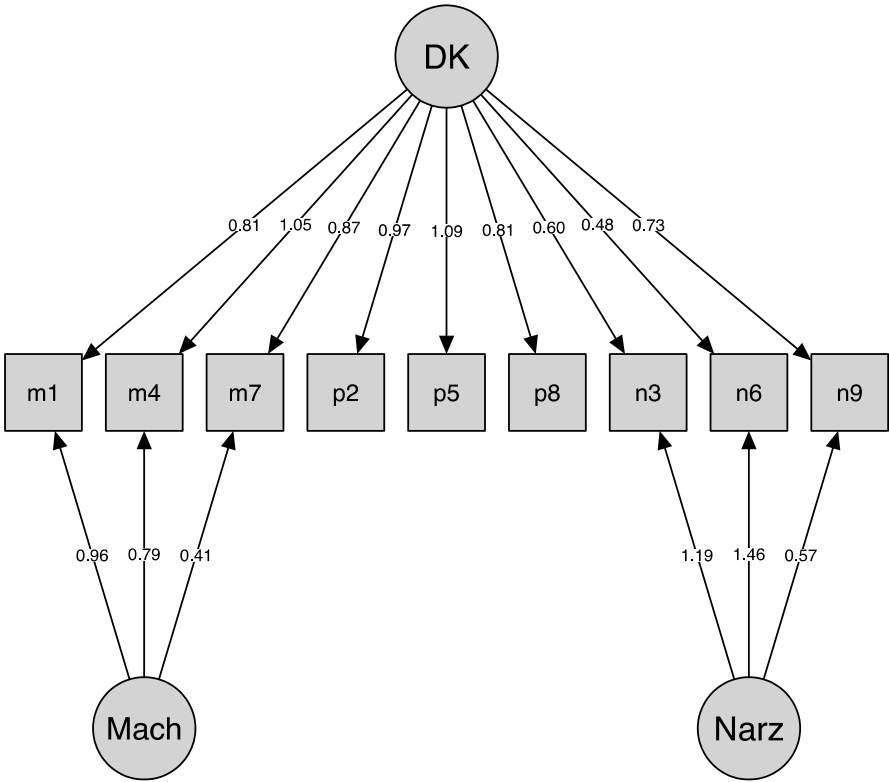

*Anmerkungen:* Es werden unstandardisierte Werte dargestellt; DK = Dunkler Kern; Mach = Machiavellismus; Narz = Narzissmus; m = Indikator für Machiavellismus; p = Indikator für Psychopathie; n = Indikator für Narzissmus; Itemnummerierung bezieht sich auf die Nummerierung in Kufner et al. (2014).

**Bifaktor-(S – 1)-Modell mit Narzissmus als Referenzkonstrukt**

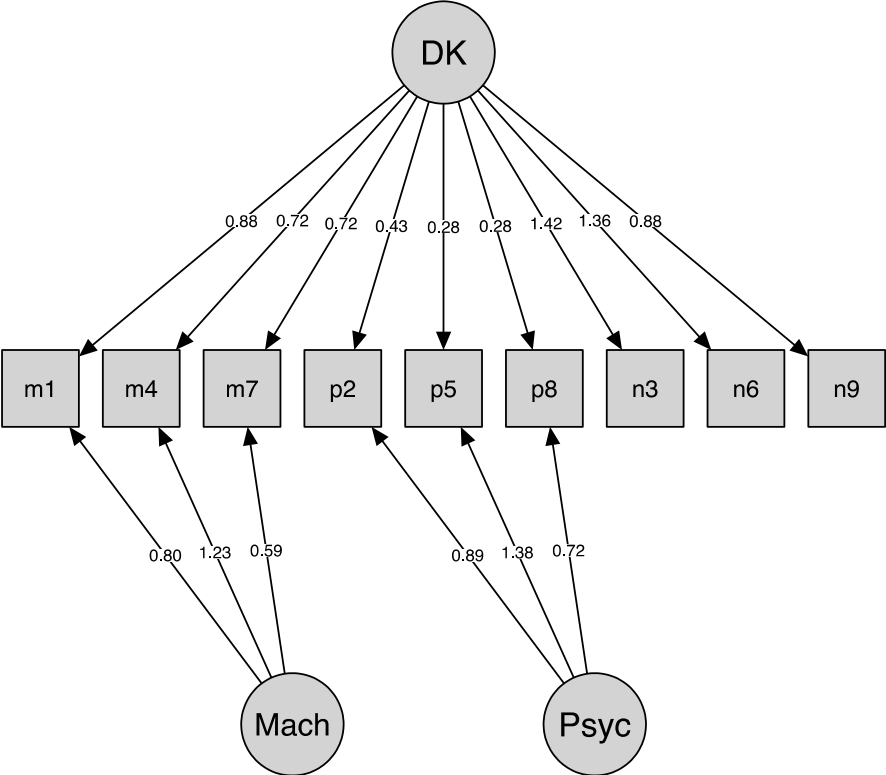

*Anmerkungen:* Es werden unstandardisierte Werte dargestellt; DK = Dunkler Kern; Mach = Machiavellismus; Psyc = Psychopathie; m = Indikator für Machiavellismus; p = Indikator für Psychopathie; n = Indikator für Narzissmus; Itemnummerierung bezieht sich auf die Nummerierung in Küfner et al. (2014).

**Bifaktor-(S-I – 1)-Modell mit einem gemeinsamen konstrukt-spezifischen Faktor für Machiavellismus und Psychopathie und einem Referenzindikator für Machiavellismus**

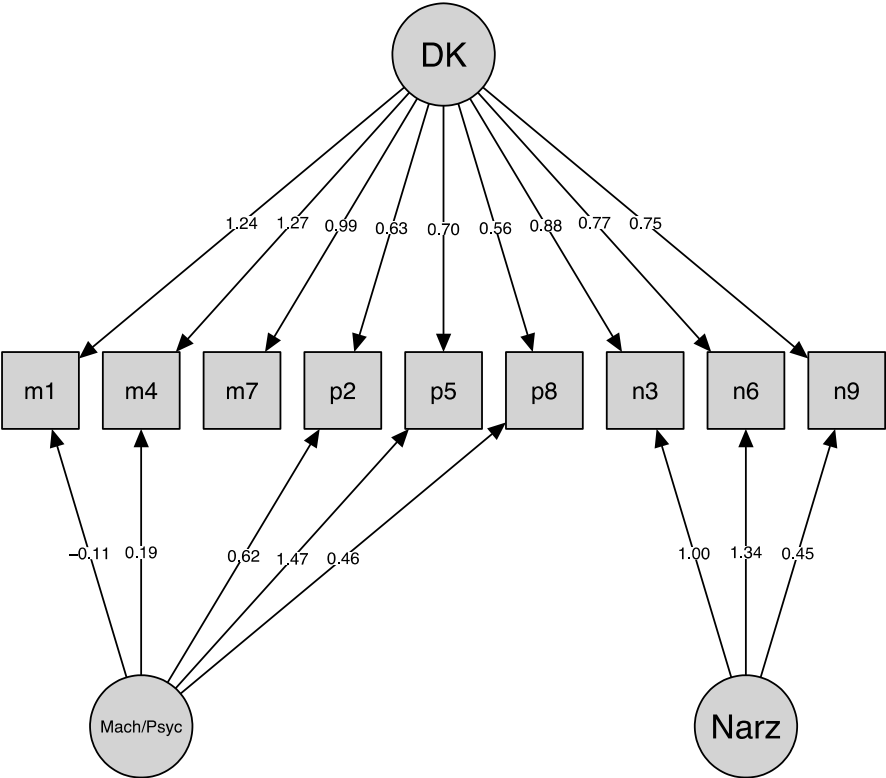

*Anmerkungen:* Es werden unstandardisierte Werte dargestellt; DK = Dunkler Kern; Mach = Machiavellismus; Psyc = Psychopathie; Narz = Narzissmus; m = Indikator für Machiavellismus; p = Indikator für Psychopathie; n = Indikator für Narzissmus; Itemnummerierung bezieht sich auf die Nummerierung in Kűfner et al. (2014).
