# Supplementary material for: Die Dunkle Triade in einer deutschen repräsentativen Stichprobe
Source: Atypon-hosted journal article supplement (doi:10.1026/0012-1924/a000292), 2022-09-05
Supplement: 0012-1924_a000292_esm10.pdf [file 0012-1924_a000292_esm10.pdf]

**ESM 10.** Gesamtnormen der Niederträchtigen Neun in Deutschland und Gruppennormen nach Geschlecht und Alter.

| Summe                  | Gesamt |       |   | Weiblich |       |   | Männlich |       |   | 14 – 17 Jahre |       |   | 18 – 29 Jahre |       |   | 30 – 49 Jahre |       |   | 50 – 65 Jahre |       |   | 66 – 80 Jahre |       |   |
|------------------------|--------|-------|---|----------|-------|---|----------|-------|---|---------------|-------|---|---------------|-------|---|---------------|-------|---|---------------|-------|---|---------------|-------|---|
|                        | PR     | z     | Q | PR       | z     | Q | PR       | z     | Q | PR            | z     | Q | PR            | z     | Q | PR            | z     | Q | PR            | z     | Q | PR            | z     | Q |
| <b>Machiavellismus</b> |        |       |   |          |       |   |          |       |   |               |       |   |               |       |   |               |       |   |               |       |   |               |       |   |
| 3                      | 7.90   | -1.41 | 1 | 9.35     | -1.32 | 1 | 6.38     | -1.52 | 1 | 6.50          | -1.51 | 1 | 4.85          | -1.66 | 1 | 8.87          | -1.35 | 1 | 8.57          | -1.37 | 1 | 8.47          | -1.37 | 1 |
| 4                      | 19.48  | -0.86 |   | 20.90    | -0.81 |   | 17.99    | -0.92 |   | 16.73         | -0.97 |   | 14.26         | -1.07 |   | 21.76         | -0.78 |   | 20.37         | -0.83 |   | 19.59         | -0.86 |   |
| 5                      | 29.10  | -0.55 | 2 | 31.96    | -0.47 | 2 | 26.09    | -0.64 | 2 | 22.13         | -0.77 |   | 20.79         | -0.81 |   | 33.94         | -0.41 | 2 | 28.75         | -0.56 | 2 | 30.07         | -0.52 | 2 |
| 6                      | 38.76  | -0.29 |   | 45.19    | -0.12 |   | 32.00    | -0.47 |   | 25.40         | -0.66 | 2 | 24.91         | -0.68 |   | 45.32         | -0.12 |   | 39.77         | -0.26 |   | 41.48         | -0.22 |   |
| 7                      | 48.27  | -0.04 |   | 56.00    | 0.15  | 3 | 40.13    | -0.25 |   | 31.30         | -0.49 |   | 30.91         | -0.50 | 2 | 57.23         | 0.18  | 3 | 50.19         | 0.00  | 3 | 48.87         | -0.03 |   |
| 8                      | 58.00  | 0.20  | 3 | 67.27    | 0.45  |   | 48.24    | -0.04 |   | 40.02         | -0.25 |   | 42.62         | -0.19 |   | 68.07         | 0.47  |   | 57.51         | 0.19  |   | 58.15         | 0.21  | 3 |
| 9                      | 65.88  | 0.41  |   | 74.94    | 0.67  |   | 56.36    | 0.16  | 3 | 49.86         | 0.00  |   | 58.14         | 0.21  | 3 | 72.74         | 0.61  |   | 64.09         | 0.36  |   | 66.24         | 0.42  |   |
| 10                     | 73.04  | 0.61  |   | 80.20    | 0.85  | 4 | 65.51    | 0.40  |   | 60.43         | 0.26  | 3 | 67.56         | 0.46  |   | 77.40         | 0.75  | 4 | 72.68         | 0.60  |   | 73.17         | 0.62  |   |
| 11                     | 79.33  | 0.82  | 4 | 85.46    | 1.06  |   | 72.88    | 0.61  |   | 71.10         | 0.56  |   | 71.70         | 0.57  |   | 81.04         | 0.88  |   | 83.28         | 0.97  | 4 | 79.51         | 0.82  | 4 |
| 12                     | 84.87  | 1.03  |   | 89.50    | 1.25  |   | 80.01    | 0.84  | 4 | 81.57         | 0.90  | 4 | 75.86         | 0.70  | 4 | 85.59         | 1.06  |   | 90.62         | 1.32  |   | 84.66         | 1.02  |   |
| 13                     | 90.27  | 1.30  |   | 93.30    | 1.50  |   | 87.08    | 1.13  |   | 88.94         | 1.22  |   | 81.63         | 0.90  |   | 91.87         | 1.40  |   | 93.66         | 1.53  |   | 91.20         | 1.35  |   |
| 14                     | 94.06  | 1.56  |   | 96.32    | 1.79  |   | 91.68    | 1.38  |   | 94.66         | 1.61  |   | 86.10         | 1.08  |   | 95.96         | 1.75  |   | 95.94         | 1.74  |   | 95.66         | 1.71  |   |
| 15                     | 95.63  | 1.71  |   | 97.20    | 1.91  |   | 93.98    | 1.55  |   | 97.75         | 2.00  |   | 88.40         | 1.20  |   | 97.08         | 1.89  |   | 97.23         | 1.92  |   | 97.35         | 1.94  |   |
| 16                     | 97.00  | 1.88  |   | 97.77    | 2.01  |   | 96.19    | 1.77  |   |               |       |   | 92.73         | 1.46  |   | 97.43         | 1.95  |   | 98.11         | 2.08  |   | 98.62         | 2.20  |   |
| 17                     | 98.04  | 2.06  |   | 98.18    | 2.09  |   | 97.89    | 2.03  |   |               |       |   | 96.14         | 1.77  |   | 97.67         | 1.99  |   | 98.81         | 2.26  |   | 99.54         | 2.60  |   |
| 18                     | 98.83  | 2.27  |   | 99.04    | 2.34  |   | 98.60    | 2.20  |   | 98.77         | 2.25  |   | 98.44         | 2.15  |   | 97.95         | 2.04  |   | 99.53         | 2.60  |   | 99.75         | 2.81  |   |
| 19                     | 99.29  | 2.45  |   |          |       |   | 98.96    | 2.31  |   |               |       |   |               |       |   | 98.15         | 2.09  |   | 99.83         | 2.93  |   |               |       |   |
| 20                     | 99.47  | 2.55  |   | 99.81    | 2.89  |   | 99.11    | 2.37  |   |               |       |   |               |       |   | 98.61         | 2.20  |   |               |       |   |               |       |   |
| 21                     | 99.80  | 2.87  |   |          |       |   | 99.58    | 2.64  |   |               |       |   | 99.77         | 2.83  |   | 99.48         | 2.56  |   | 99.88         | 3.05  |   |               |       |   |
| <b>Psychopathie</b>    |        |       |   |          |       |   |          |       |   |               |       |   |               |       |   |               |       |   |               |       |   |               |       |   |
| 3                      | 9.73   | -1.30 | 1 | 12.69    | -1.14 | 1 | 6.61     | -1.51 | 1 | 8.52          | -1.37 | 1 | 10.08         | -1.28 | 1 | 6.83          | -1.49 | 1 | 13.80         | -1.09 | 1 | 9.22          | -1.33 | 1 |
| 4                      | 23.80  | -0.71 |   | 29.73    | -0.53 | 2 | 17.56    | -0.93 |   | 17.97         | -0.92 |   | 22.55         | -0.75 |   | 20.72         | -0.82 |   | 30.91         | -0.50 | 2 | 21.45         | -0.79 |   |
| 5                      | 32.53  | -0.45 | 2 | 38.11    | -0.30 |   | 26.66    | -0.62 | 2 | 20.44         | -0.83 |   | 30.53         | -0.51 | 2 | 31.04         | -0.49 | 2 | 39.65         | -0.26 |   | 28.94         | -0.56 | 2 |
| 6                      | 43.96  | -0.15 |   | 48.42    | -0.04 |   | 39.26    | -0.27 |   | 29.75         | -0.53 | 2 | 43.56         | -0.16 |   | 42.45         | -0.19 |   | 52.22         | 0.06  | 3 | 36.96         | -0.33 |   |
| 7                      | 54.74  | 0.12  | 3 | 59.10    | 0.23  | 3 | 50.16    | 0.00  | 3 | 38.99         | -0.28 |   | 57.45         | 0.19  | 3 | 54.92         | 0.12  | 3 | 61.11         | 0.28  |   | 43.82         | -0.16 |   |
| 8                      | 63.20  | 0.34  |   | 67.47    | 0.45  |   | 58.70    | 0.22  |   | 45.80         | -0.11 |   | 66.11         | 0.42  |   | 65.93         | 0.41  |   | 66.53         | 0.43  |   | 51.85         | 0.05  | 3 |
| 9                      | 72.01  | 0.58  |   | 76.28    | 0.72  | 4 | 67.51    | 0.45  |   | 60.13         | 0.26  | 3 | 71.16         | 0.56  |   | 77.35         | 0.75  | 4 | 73.83         | 0.64  |   | 60.38         | 0.26  |   |
| 10                     | 79.13  | 0.81  | 4 | 83.66    | 0.98  |   | 74.36    | 0.65  |   | 76.17         | 0.71  | 4 | 76.17         | 0.71  | 4 | 84.26         | 1.01  |   | 80.40         | 0.86  | 4 | 69.29         | 0.50  |   |
| 11                     | 84.25  | 1.00  |   | 88.43    | 1.20  |   | 79.85    | 0.84  | 4 | 86.39         | 1.10  |   | 79.83         | 0.84  |   | 89.16         | 1.24  |   | 84.88         | 1.03  |   | 76.55         | 0.72  | 4 |
| 12                     | 88.43  | 1.20  |   | 91.38    | 1.36  |   | 85.32    | 1.05  |   | 91.40         | 1.37  |   | 83.92         | 0.99  |   | 93.44         | 1.51  |   | 88.40         | 1.20  |   | 81.53         | 0.90  |   |
| 13                     | 92.22  | 1.42  |   | 93.22    | 1.49  |   | 91.17    | 1.35  |   | 94.90         | 1.64  |   | 87.69         | 1.16  |   | 95.72         | 1.72  |   | 92.45         | 1.44  |   | 88.53         | 1.20  |   |

| Summe             | Gesamt |       |   | Weiblich |       |   | Männlich |       |   | 14 – 17 Jahre |       |   | 18 – 29 Jahre |       |   | 30 – 49 Jahre |       |   | 50 – 65 Jahre |       |   | 66 – 80 Jahre |       |   |
|-------------------|--------|-------|---|----------|-------|---|----------|-------|---|---------------|-------|---|---------------|-------|---|---------------|-------|---|---------------|-------|---|---------------|-------|---|
|                   | PR     | z     | Q | PR       | z     | Q | PR       | z     | Q | PR            | z     | Q | PR            | z     | Q | PR            | z     | Q | PR            | z     | Q | PR            | z     | Q |
| 14                | 94.76  | 1.62  |   | 95.09    | 1.65  |   | 94.41    | 1.59  |   | 96.22         | 1.78  |   | 89.42         | 1.25  |   | 96.83         | 1.86  |   | 95.70         | 1.72  |   | 94.23         | 1.57  |   |
| 15                | 96.35  | 1.79  |   | 96.65    | 1.83  |   | 96.04    | 1.76  |   | 97.25         | 1.92  |   | 91.48         | 1.37  |   | 97.31         | 1.93  |   | 98.13         | 2.08  |   | 96.55         | 1.82  |   |
| 16                | 97.45  | 1.95  |   | 97.60    | 1.98  |   | 97.30    | 1.93  |   |               |       |   |               |       |   | 97.87         | 2.03  |   | 99.45         | 2.55  |   | 98.21         | 2.10  |   |
| 17                | 98.12  | 2.08  |   | 97.88    | 2.03  |   | 98.37    | 2.14  |   | 98.36         | 2.14  |   | 93.92         | 1.55  |   | 98.65         | 2.21  |   |               |       |   | 99.04         | 2.34  |   |
| 18                | 98.97  | 2.32  |   | 98.97    | 2.31  |   | 98.92    | 2.30  |   | 98.88         | 2.28  |   | 97.36         | 1.94  |   |               |       |   | 99.53         | 2.60  |   | 99.60         | 2.65  |   |
| 19                | 99.54  | 2.61  |   | 99.90    | 3.09  |   | 99.11    | 2.37  |   | 99.10         | 2.37  |   | 99.77         | 2.83  |   |               |       |   | 99.81         | 2.89  |   | 99.73         | 2.78  |   |
| 20                | 99.80  | 2.89  |   | 99.94    | 3.23  |   | 99.61    | 2.66  |   |               |       |   |               |       |   | 99.48         | 2.56  |   | 99.86         | 2.98  |   |               |       |   |
| 21                |        |       |   |          |       |   |          |       |   |               |       |   |               |       |   |               |       |   |               |       |   |               |       |   |
| <b>Narzissmus</b> |        |       |   |          |       |   |          |       |   |               |       |   |               |       |   |               |       |   |               |       |   |               |       |   |
| 3                 | 3.24   | -1.85 | 1 | 4.78     | -1.67 | 1 | 1.61     | -2.14 | 1 |               |       | 1 | 0.50          | -2.58 | 1 | 2.65          | -1.93 | 1 | 4.08          | -1.74 | 1 | 7.01          | -1.47 | 1 |
| 4                 | 8.14   | -1.40 |   | 11.34    | -1.21 |   | 4.77     | -1.67 |   | 7.53          | -1.44 |   | 3.22          | -1.85 |   | 6.80          | -1.49 |   | 9.23          | -1.33 |   | 15.37         | -1.02 |   |
| 5                 | 14.04  | -1.08 |   | 17.17    | -0.95 |   | 10.74    | -1.24 |   | 16.61         | -0.97 |   | 9.64          | -1.30 |   | 14.41         | -1.06 |   | 12.91         | -1.13 |   | 19.79         | -0.85 |   |
| 6                 | 24.49  | -0.69 |   | 29.90    | -0.53 | 2 | 18.78    | -0.89 |   | 23.53         | -0.72 |   | 14.25         | -1.07 |   | 31.55         | -0.48 | 2 | 20.91         | -0.81 |   | 26.81         | -0.62 | 2 |
| 7                 | 35.86  | -0.36 | 2 | 44.05    | -0.15 |   | 27.22    | -0.61 | 2 | 29.68         | -0.53 | 2 | 20.50         | -0.82 |   | 48.83         | -0.03 |   | 30.52         | -0.51 | 2 | 34.90         | -0.39 |   |
| 8                 | 45.52  | -0.11 |   | 53.82    | 0.10  | 3 | 36.76    | -0.34 |   | 33.48         | -0.43 |   | 30.70         | -0.50 | 2 | 60.65         | 0.27  | 3 | 38.41         | -0.29 |   | 43.49         | -0.16 |   |
| 9                 | 53.53  | 0.09  | 3 | 61.73    | 0.30  |   | 44.87    | -0.13 |   | 39.38         | -0.27 |   | 36.46         | -0.35 |   | 68.63         | 0.49  |   | 47.61         | -0.06 |   | 52.65         | 0.07  | 3 |
| 10                | 59.83  | 0.25  |   | 66.97    | 0.44  |   | 52.30    | 0.06  | 3 | 49.24         | -0.02 |   | 40.34         | -0.24 |   | 73.06         | 0.61  |   | 56.75         | 0.17  | 3 | 60.38         | 0.26  |   |
| 11                | 65.06  | 0.39  |   | 71.54    | 0.57  |   | 58.23    | 0.21  |   | 57.65         | 0.19  | 3 | 44.80         | -0.13 |   | 76.73         | 0.73  | 4 | 62.40         | 0.32  |   | 68.63         | 0.49  |   |
| 12                | 71.28  | 0.56  |   | 77.55    | 0.76  | 4 | 64.66    | 0.38  |   | 69.55         | 0.51  |   | 52.21         | 0.06  | 3 | 80.00         | 0.84  |   | 68.55         | 0.48  |   | 78.87         | 0.80  | 4 |
| 13                | 78.06  | 0.77  | 4 | 83.26    | 0.96  |   | 72.56    | 0.60  |   | 80.28         | 0.85  | 4 | 63.20         | 0.34  |   | 83.69         | 0.98  |   | 75.77         | 0.70  | 4 | 86.02         | 1.08  |   |
| 14                | 83.67  | 0.98  |   | 88.28    | 1.19  |   | 78.81    | 0.80  | 4 | 82.80         | 0.95  |   | 72.26         | 0.59  |   | 87.29         | 1.14  |   | 82.69         | 0.94  |   | 90.76         | 1.33  |   |
| 15                | 89.34  | 1.24  |   | 92.13    | 1.41  |   | 86.39    | 1.10  |   | 84.97         | 1.04  |   | 78.31         | 0.78  | 4 | 91.60         | 1.38  |   | 90.84         | 1.33  |   | 95.62         | 1.71  |   |
| 16                | 94.04  | 1.56  |   | 95.53    | 1.70  |   | 92.47    | 1.44  |   | 88.36         | 1.19  |   | 85.50         | 1.06  |   | 95.26         | 1.67  |   | 96.52         | 1.81  |   | 98.40         | 2.15  |   |
| 17                | 96.63  | 1.83  |   | 98.11    | 2.08  |   | 95.07    | 1.65  |   | 90.46         | 1.31  |   | 92.50         | 1.44  |   | 96.98         | 1.88  |   | 98.30         | 2.12  |   | 99.14         | 2.38  |   |
| 18                | 98.25  | 2.11  |   | 99.08    | 2.36  |   | 97.39    | 1.94  |   | 93.44         | 1.51  |   | 97.09         | 1.89  |   | 98.21         | 2.10  |   | 98.97         | 2.31  |   | 99.67         | 2.72  |   |
| 19                | 99.23  | 2.42  |   | 99.70    | 2.75  |   | 98.74    | 2.24  |   | 97.55         | 1.97  |   | 99.57         | 2.63  |   | 98.61         | 2.20  |   | 99.55         | 2.61  |   |               |       |   |
| 20                | 99.73  | 2.79  |   | 99.94    | 3.23  |   | 99.46    | 2.55  |   |               |       |   |               |       |   | 99.38         | 2.50  |   | 99.86         | 2.99  |   |               |       |   |
| 21                | 99.96  | 3.33  |   |          |       |   | 99.91    | 3.12  |   |               |       |   | 99.78         | 2.84  |   |               |       |   |               |       |   | 99.80         | 2.89  |   |

Anmerkungen: PR = Intervallmitten-Prozentrang; z = z-Wert äquivalente der Intervallmitten-Flächenanteile; Q = Quartil.
