# Supplementary figures and images for: Die Dunkle Triade in einer deutschen repräsentativen Stichprobe
Source: Atypon-hosted journal article supplement (doi:10.1026/0012-1924/a000292), 2022-09-05

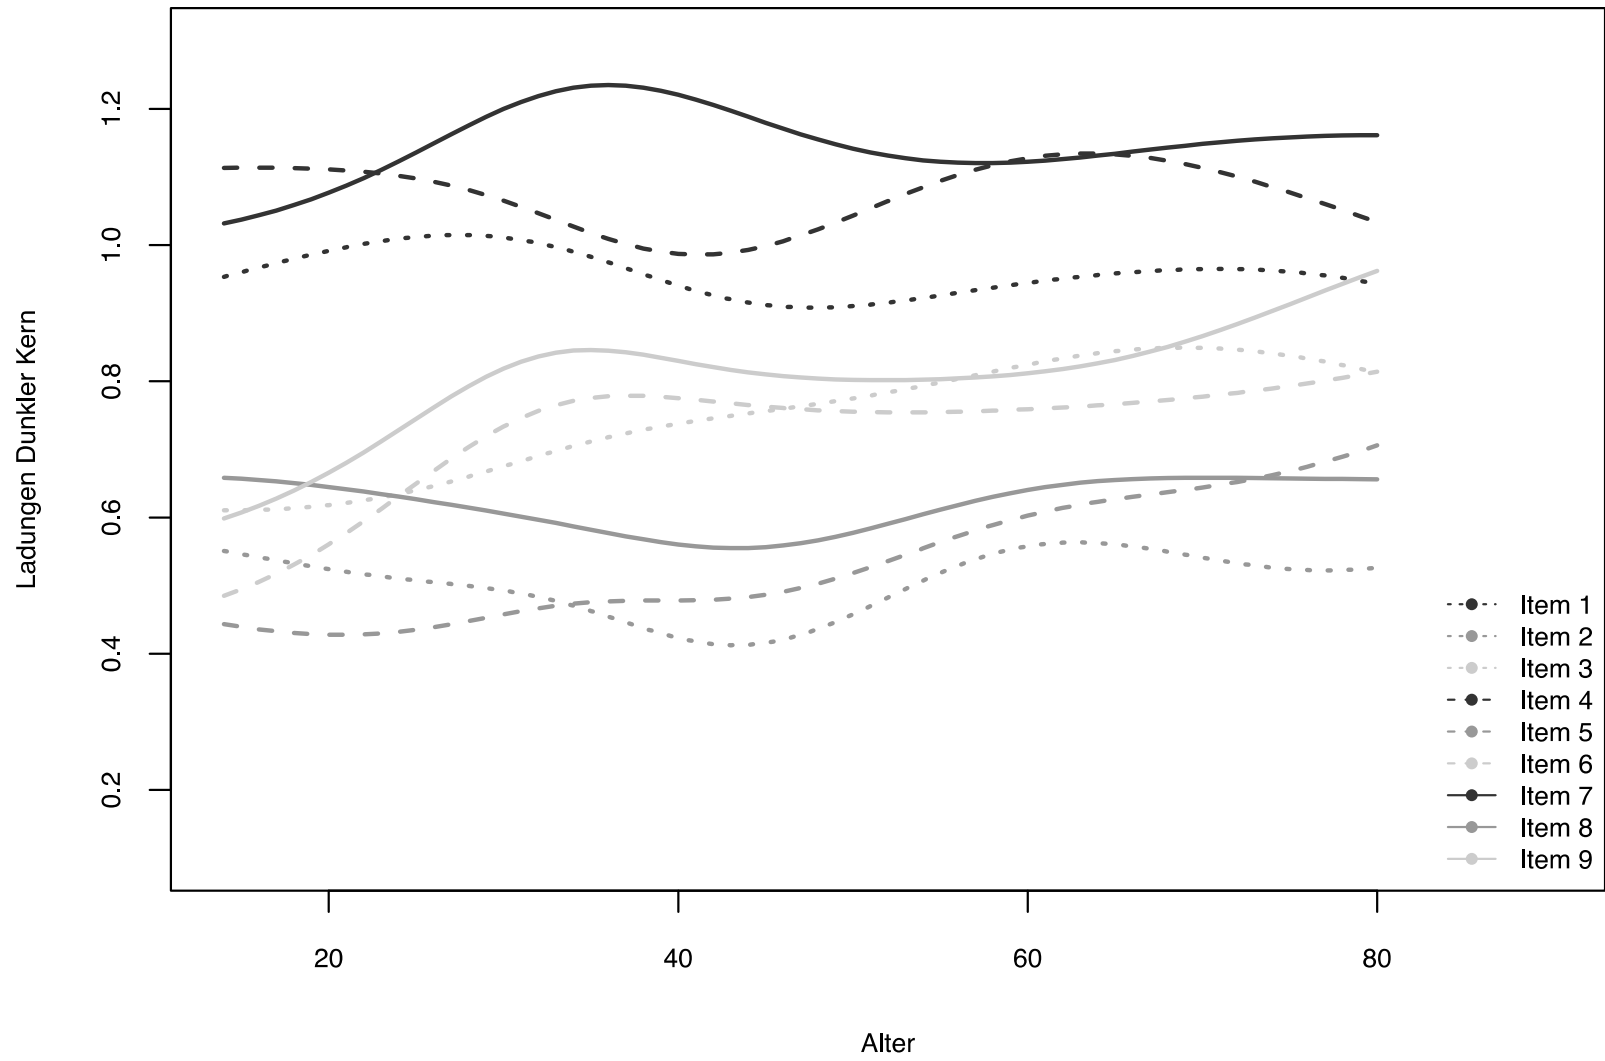

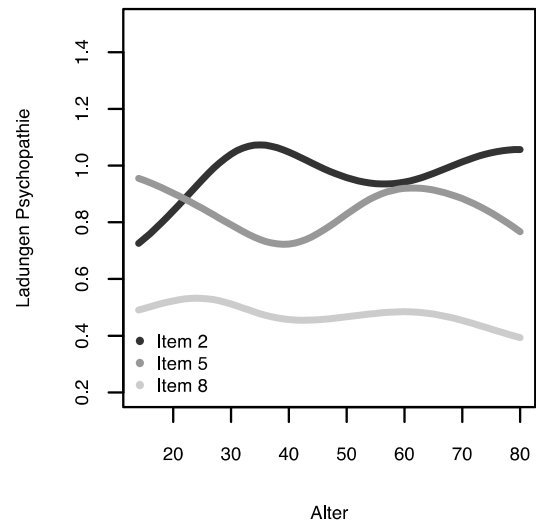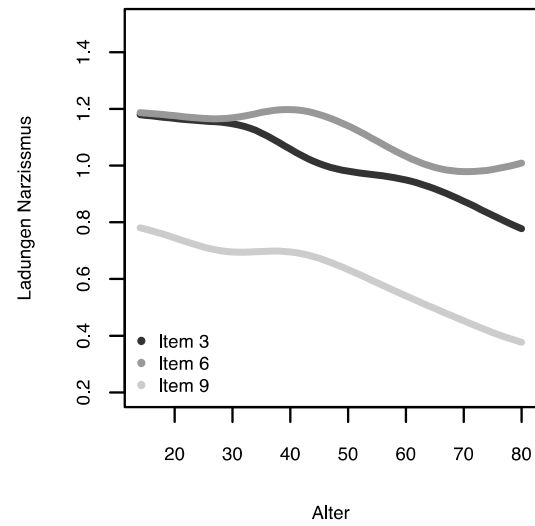

Anmerkungen: Itemnummerierung bezieht sich auf die Nummerierung in Küfner et al. (2014).

Supplement: 0012-1924_a000292_esm8.pdf [file 0012-1924_a000292_esm8.pdf]
